# Supplementary material
Source: MDPI journal article supplement (https://www.mdpi.com/2073-4433/9/10/372)
Supplement: s1 [file s1]

**Table S1.** The mixing ratios of NMHCs at the Backgarden site (median ± 95% confidence interval).

| **Species** | **Mixing Ratio (pptv)** |
| --- | --- |
| Propane | 1956 ± 180 |
| Propene | 1056 ± 92 |
| *i*-Butane | 605 ± 83 |
| *n*-Butane | 967 ± 122 |
| *trans*-2-Butene | 91 ± 16 |
| 1-Butene | 273 ± 32 |
| *cis*-2-Butene | 90 ± 14 |
| Cyclopentane | 86 ± 49 |
| *i*-Pentane | 704 ± 98 |
| *n*-Pentane | 423 ± 78 |
| *trans*-2-Pentene | 32 ± 6 |
| 1-Pentene | 59 ± 8 |
| *cis*-2-Pentene | 23 ± 4 |
| 2,2-Dimethylbutane | 112 ± 58 |
| Methylcyclopentane | 56 ± 33 |
| 2,3-Dimethylbutane | 40 ± 14 |
| 2-Methylpentane | 188 ± 69 |
| 3-Methylpentane | 171 ± 53 |
| Isoprene | 616 ± 90 |
| 2,4-Dimethylpentane | 121 ± 86 |
| *n*-Hexane | 552 ± 167 |
| Benzene | 1437 ± 162 |
| Cyclohexane | 126 ± 51 |
| 2-Methylhexane | 340 ± 96 |
| 2,3-Dimethylpentane | 25 ± 6 |
| 3-Methylhexane | 240 ± 61 |
| *n*-Heptane | 239 ± 103 |
| Methylcyclohexane | 119 ± 82 |
| Toluene | 1631 ± 493 |
| 2-Methylheptane | 78 ± 26 |
| 3-Methylheptane | 77 ± 32 |
| *n*-Octane | 88 ± 26 |
| Ethylbenzene | 355 ± 73 |
| *m+p*-Xylene | 449 ± 114 |
| Styrene | 170 ± 41 |
| *o*-Xylene | 210 ± 44 |
| *n*-Nonane | 24 ± 5 |
| *i*-Propylbenzne | 17 ± 3 |
| *n*-Propylbenzene | 33 ± 5 |
| *m*-Ethyltoluene | 63 ± 15 |
| *p*-Ethyltoluene | 19 ± 7 |
| 1,3,5-Trimethylbenzene | 21 ± 8 |
| *o*-Ethyltoluene | 59 ± 10 |
| 1,2,4-Trimethylbenzene | 129 ± 27 |
| *n*-Decane | 40 ± 5 |
| 1,2,3-Trimethylbenzene | 40 ± 8 |
| *m*-Diethylbenzene | 29 ± 3 |
| *p*-Diethylbenzene | 12 ± 2 |
| *n*-Undecane | 32 ± 4 |
| *n*-Dodecane | 19 ± 3 |

**Figure S1.** The correlation between observed and simulated data of PAN (**a**) and O3 (**b**) at the BGS site (unit: ppbv).


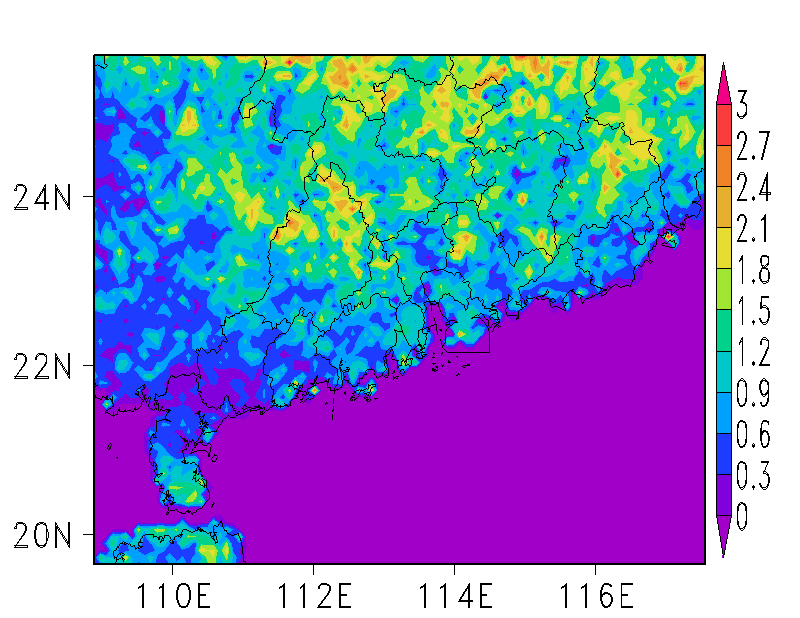

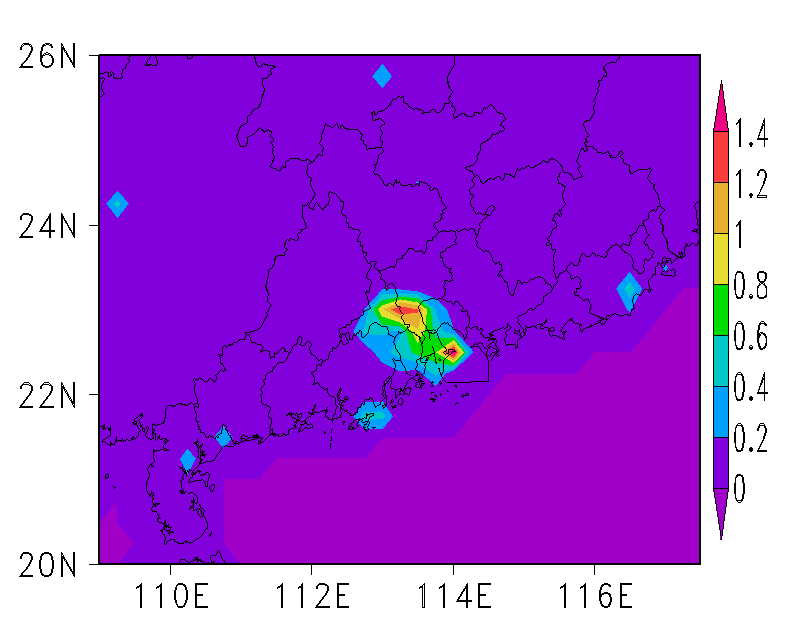


**Figure S2.** Emission rate for NOx and isoprene in Guangdong Province. The left panel is isoprene and the right panel is NOx (unit: mole/s). The figure indicates that isoprene in the rural area is higher than urban center while NOx is opposite.
